# Supplementary material for: Spatial-temporal patterns of anthropogenic and biomass burning contributions on air pollution and mortality burden changes in India from 1995 to 2014
Source: Copernicus journal article supplement (doi:10.5194/egusphere-2024-974), 2024-05-06
Supplement: Supplementary file 1 [file egusphere-2024-974-supplement.pdf]

*Supplement of*

**Spatial-temporal patterns of anthropogenic and biomass burning contributions on air pollution and mortality burden changes in India from 1995 to 2014**

5 **Bin Luo et al.**

*Correspondence to:* Yuqiang Zhang (yuqiang.zhang@sdu.edu.cn), Likun Xue (xuelikun@sdu.edu.cn)

**Table S1.** Comparison of studies for estimation of PWC (Population weighted concentration) and PM<sub>2.5</sub> mortality.

| Study                     | Time      | Model                                            | PWC ( $\mu\text{g m}^{-3}$ ) | Average ( $\mu\text{g m}^{-3}$ ) | PM <sub>2.5</sub> Mortality in India (millions) | Resolution           | Domain |
|---------------------------|-----------|--------------------------------------------------|------------------------------|----------------------------------|-------------------------------------------------|----------------------|--------|
| Conibear et al. (2018)    | 2014      | WRF-Chem                                         | 57.2                         | /                                | 0.99                                            | 30 km $\times$ 30 km | India  |
| Chowdhury and Dey, (2016) | 2001-2010 | Satellite data with factors from GEOS-Chem model | /                            | 46.5                             | 0.81                                            | 0.5° $\times$ 0.5°   | India  |
| Apte et al. (2015)        | 2010      | a combination of satellite and GEOS-Chem         | 28                           | /                                | /                                               | /                    | Global |
| Anenberg et al. (2010)    | 2000      | MOZART-2                                         | 20.41                        | /                                | /                                               | 2.8° $\times$ 2.8°   | Global |
| Silva et al. (2016)       | 2005      | MOZART-4                                         | 28.5                         | /                                | 0.39                                            | 0.67° $\times$ 0.5°  | Global |
| Jia et al. (2021)         | 1998      | van Donkelaar et al. (2016)                      | 36.9                         | 26.0                             | 0.58                                            | 0.1° $\times$ 0.1°   | Global |
|                           | 2015      |                                                  | 58.3                         | 41.4                             | 0.91                                            |                      |        |
| Sahu et al. (2020)        | 2015      | GAM                                              | 89                           | /                                | 1.61                                            | 36 km $\times$ 36 km | India  |
| Brauer et al. (2016)      | 2013      | Satellite & CTM estimates                        | 46.7                         | /                                | /                                               | 0.1° $\times$ 0.1°   | Global |
| Guo et al. (2018)         | 2015      | CMAQ                                             | 32.8                         | /                                | 1.04                                            | 36 km $\times$ 36 km | India  |
| Cohen et al. (2017)       | 2015      | GEOS-Chem                                        | 74.3                         | /                                | 1.09                                            | 56 km $\times$ 74 km | Global |

10 **Table S2.** Comparison of studies for estimation of O<sub>3</sub> concentrations and mortality.

| Study                  | Time      | Model                     | units                 | value (ppbv) | O <sub>3</sub> Mortality in India (millions) | Resolution      | Domain |
|------------------------|-----------|---------------------------|-----------------------|--------------|----------------------------------------------|-----------------|--------|
| Anenberg et al. (2010) | 2000      | MOZART-2                  | 6mMDA8 (pop-weighted) | 59.64        | /                                            | 2.8° × 2.8°     | global |
| Silva et al. (2016)    | 2005      | MOZART-4                  | 6mMDA8 (pop-weighted) | 60.5         | 0.16                                         | 0.67° × 0.5°    | global |
| Brauer et al. (2016)   | 2013      | Satellite & CTM estimates | 3mMDA1 (pop-weighted) | 74.0         | /                                            | 0.1° × 0.1°     | Global |
| Liu et al. (2021)      | 2014      | G5NR-chem                 | average               | 63.4         | 0.096                                        | 0.125° × 0.125° | India  |
| Hakim et al. (2019)    | 2009-2010 | Multi-model               | area-weighted         | 37.26-56.11  | /                                            | /               | India  |
|                        |           |                           | pop-weighted          | 41.38-57.5   | /                                            | /               |        |
| Conibear et al. (2018) | 2015      | WRF-chem                  | pop-weighted ADM8h    | 77.2         | 0.37                                         | 30 km × 30 km   | India  |
|                        |           |                           | pop-weighted 3mDMA1   | 94.5         |                                              |                 |        |
| Sharma et al. (2016)   | 2010      | WRF-CMAQ                  | average               | 44.3         | /                                            | 36 km × 36 km   | India  |

**Table S3.** Contributions of biomass burning emissions changes to the seasonal area-weighted PM<sub>2.5</sub> and O<sub>3</sub> concentrations in the states of India from 1995 to 2014.

| States                 | PM <sub>2.5</sub> ( $\mu\text{g m}^{-3}$ ) |       |       |       | O <sub>3</sub> (ppbv) |       |       |       |
|------------------------|--------------------------------------------|-------|-------|-------|-----------------------|-------|-------|-------|
|                        | DJF                                        | MAM   | JJA   | SON   | DJF                   | MAM   | JJA   | SON   |
| Andaman and Nicobar    | -0.03                                      | 1.02  | 0.46  | 0.44  | -1.19                 | 0.51  | 0.08  | -0.68 |
| Andhra Pradesh         | 0.85                                       | 0.75  | -0.38 | 0.57  | 0.60                  | -0.20 | -1.21 | 0.54  |
| Arunachal Pradesh      | -0.88                                      | 3.89  | -0.27 | 0.15  | -0.88                 | 1.68  | -0.87 | 0.07  |
| Assam                  | -0.55                                      | 3.97  | -0.11 | -0.16 | -0.37                 | 0.68  | 0.11  | 0.29  |
| Bihar                  | -0.91                                      | 0.85  | -5.27 | -1.78 | 0.12                  | 0.20  | -1.81 | -0.16 |
| Chandigarh             | -0.37                                      | -0.45 | 0.68  | 0.44  | -0.14                 | -0.49 | 0.11  | -0.53 |
| Chhattisgarh           | 0.43                                       | -0.89 | -2.39 | -0.59 | 0.31                  | -0.64 | -1.50 | 0.00  |
| Dadra and Nagar Haveli | /                                          | /     | /     | /     | /                     | /     | /     | /     |
| Daman and Diu          | /                                          | /     | /     | /     | /                     | /     | /     | /     |
| Goa                    | 0.67                                       | -0.66 | -0.33 | 1.09  | -0.01                 | -0.41 | -0.57 | 1.03  |
| Gujarat                | -0.40                                      | -0.17 | 0.16  | -0.20 | 0.02                  | -0.37 | -0.60 | -0.09 |
| Haryana                | 0.41                                       | -0.59 | 1.17  | 0.97  | -0.10                 | -0.64 | 0.14  | 0.23  |
| Himachal Pradesh       | 0.06                                       | -0.23 | 0.00  | -0.60 | -0.70                 | -0.32 | -0.34 | -1.66 |
| Jharkhand              | -1.04                                      | -0.30 | -3.35 | -2.31 | -0.35                 | -0.29 | -0.99 | -0.12 |
| Karnataka              | 1.19                                       | -0.67 | -0.22 | -0.12 | 0.08                  | -0.45 | -0.49 | -0.21 |
| Kerala                 | 0.40                                       | 0.59  | 0.36  | -0.68 | -0.38                 | 0.22  | -0.27 | -0.53 |
| Lakshadweep            | /                                          | /     | /     | /     | /                     | /     | /     | /     |
| Madhya Pradesh         | -0.04                                      | -0.29 | -0.11 | -0.40 | 0.05                  | -0.32 | -0.68 | 0.00  |
| Maharashtra            | 0.42                                       | -0.91 | -0.93 | -0.03 | 0.31                  | -0.58 | -0.76 | 0.55  |
| Manipur                | -3.14                                      | 13.35 | -0.16 | 0.06  | -0.95                 | 1.88  | 0.32  | 0.56  |
| Meghalaya              | 0.16                                       | 0.86  | -0.66 | -0.08 | -0.24                 | 0.14  | 0.45  | 0.55  |
| Mizoram                | -2.32                                      | -0.70 | 0.13  | 0.53  | -0.46                 | 0.20  | -0.02 | 0.84  |
| Nagaland               | -3.50                                      | 9.43  | -0.18 | -0.27 | -0.85                 | 2.04  | 0.17  | 0.35  |

| States        | PM <sub>2.5</sub> ( $\mu\text{g m}^{-3}$ ) |       |       |       | O <sub>3</sub> (ppbv) |       |       |       |
|---------------|--------------------------------------------|-------|-------|-------|-----------------------|-------|-------|-------|
|               | DJF                                        | MAM   | JJA   | SON   | DJF                   | MAM   | JJA   | SON   |
| NCT of Delhi  | 0.67                                       | -0.46 | 2.28  | 1.78  | -0.31                 | -0.85 | -0.80 | -1.13 |
| Odisha        | -1.27                                      | 0.32  | -1.39 | 1.27  | -0.18                 | -0.20 | -1.44 | 0.58  |
| Puducherry    | /                                          | /     | /     | /     | /                     | /     | /     | /     |
| Punjab        | 0.56                                       | -0.43 | 0.86  | 0.82  | -0.08                 | -0.65 | -0.14 | 0.72  |
| Rajasthan     | 0.13                                       | -0.06 | 0.34  | -0.50 | -0.12                 | -0.28 | -0.10 | -0.13 |
| Sikkim        | -0.64                                      | 0.92  | -0.63 | -0.44 | -0.44                 | 0.14  | -3.28 | 0.75  |
| Tamil Nadu    | 1.07                                       | 1.20  | 0.08  | -0.88 | -0.34                 | 0.34  | -0.44 | -1.00 |
| Telangana     | 1.25                                       | 0.48  | -0.84 | 0.51  | 0.94                  | -0.61 | -1.11 | 0.69  |
| Tripura       | -1.40                                      | -1.46 | -0.20 | 0.45  | -0.48                 | 0.14  | 0.04  | 0.90  |
| Uttar Pradesh | -0.12                                      | 0.27  | -0.15 | -0.49 | -0.08                 | -0.10 | -0.45 | -0.24 |
| Uttarakhand   | -0.09                                      | -0.54 | 0.92  | -0.79 | -0.76                 | -0.46 | 0.38  | -2.00 |
| West Bengal   | -1.46                                      | 0.48  | -3.27 | 0.34  | -0.35                 | -0.27 | -1.36 | 1.14  |

15 **Table S4.** The contributions to premature mortality attributable to PM<sub>2.5</sub> per capita (avoided deaths per 100,000 people) from changes in ANTHRO and BB emissions in the states of India from 1995 to 2000, 2005 and 2010-2014. The units are avoided deaths per 100,000 people.

| States                 | Due to Anthro |       |       |       |       |       |       | Due to BB |       |       |       |       |       |       |
|------------------------|---------------|-------|-------|-------|-------|-------|-------|-----------|-------|-------|-------|-------|-------|-------|
|                        | 2000          | 2005  | 2010  | 2011  | 2012  | 2013  | 2014  | 2000      | 2005  | 2010  | 2011  | 2012  | 2013  | 2014  |
| Andaman and Nicobar    | -2.91         | 2.23  | 4.38  | 1.13  | 2.75  | 4.54  | 4.49  | -0.84     | 1.16  | 0.63  | -0.33 | 0.20  | -0.25 | 0.96  |
| Andhra Pradesh         | 2.00          | 5.52  | 10.39 | 10.15 | 9.68  | 9.76  | 11.58 | -0.34     | 0.67  | 0.51  | 0.26  | 0.12  | 0.19  | 0.54  |
| Arunachal Pradesh      | 2.64          | 7.25  | 10.82 | 11.30 | 12.02 | 11.90 | 12.18 | 4.86      | -1.87 | -1.84 | -2.51 | -1.18 | -0.22 | 1.93  |
| Assam                  | 2.73          | 5.55  | 8.66  | 9.29  | 9.28  | 9.40  | 10.09 | 0.82      | -0.45 | -0.42 | -0.66 | -0.44 | -0.44 | 0.49  |
| Bihar                  | 3.52          | 6.67  | 11.69 | 12.32 | 11.15 | 12.17 | 12.04 | -0.60     | 0.15  | 0.38  | 0.20  | -0.18 | 0.06  | -1.02 |
| Chandigarh             | 11.22         | 25.72 | 55.15 | 43.36 | 41.01 | 52.19 | 44.85 | -5.15     | 0.65  | 0.20  | 2.22  | 0.11  | 4.72  | 0.29  |
| Chhattisgarh           | 2.90          | 7.63  | 13.18 | 12.60 | 12.27 | 14.14 | 13.14 | -0.52     | -0.18 | 0.49  | 0.44  | 0.15  | 0.53  | -0.82 |
| Dadra and Nagar Haveli | /             | /     | /     | /     | /     | /     | /     | /         | /     | /     | /     | /     | /     | /     |
| Daman and Diu          | /             | /     | /     | /     | /     | /     | /     | /         | /     | /     | /     | /     | /     | /     |
| Goa                    | 0.56          | 1.47  | 2.63  | 2.65  | 2.49  | 2.65  | 3.16  | -0.14     | 0.24  | -0.05 | -0.15 | -0.02 | 0.02  | 0.08  |
| Gujarat                | 1.60          | 4.46  | 8.43  | 7.25  | 6.60  | 7.57  | 8.47  | 0.12      | 0.04  | 0.44  | 0.71  | -0.03 | 0.25  | -0.21 |
| Haryana                | 3.76          | 6.91  | 12.96 | 11.34 | 10.41 | 12.88 | 11.38 | -0.52     | -0.40 | 0.18  | 0.33  | 0.05  | 1.00  | 0.36  |
| Himachal Pradesh       | 0.57          | 4.09  | 8.87  | 7.29  | 6.31  | 8.72  | 7.02  | -1.20     | -0.36 | 0.41  | 0.36  | 0.01  | 0.92  | -0.39 |
| Jharkhand              | 4.56          | 10.20 | 16.18 | 17.20 | 16.26 | 17.01 | 16.84 | -0.64     | -0.04 | 0.05  | 0.14  | 0.19  | 0.00  | -1.72 |
| Karnataka              | 1.74          | 5.07  | 10.05 | 10.25 | 9.54  | 9.61  | 11.12 | -0.52     | 0.55  | -0.15 | 0.34  | -0.23 | -0.11 | 0.07  |
| Kerala                 | 1.11          | 2.58  | 6.19  | 6.69  | 6.14  | 5.70  | 7.19  | -0.77     | -0.20 | 0.30  | 0.39  | 0.08  | -0.29 | 0.21  |
| Lakshadweep            | /             | /     | /     | /     | /     | /     | /     | /         | /     | /     | /     | /     | /     | /     |
| Madhya Pradesh         | 2.49          | 5.98  | 10.76 | 9.50  | 9.12  | 10.91 | 10.27 | -0.57     | -0.43 | 0.38  | 0.48  | 0.11  | 0.61  | -0.17 |
| Maharashtra            | 1.82          | 5.34  | 9.78  | 8.82  | 8.11  | 9.48  | 9.63  | -0.37     | 0.08  | 0.07  | 0.19  | -0.28 | 0.36  | -0.32 |
| Manipur                | 2.11          | 4.42  | 7.89  | 8.44  | 8.67  | 8.95  | 8.60  | 1.70      | -3.03 | 3.02  | -3.83 | -0.85 | -1.48 | 2.55  |
| Meghalaya              | 6.36          | 12.25 | 17.46 | 17.53 | 17.60 | 17.34 | 19.58 | 0.79      | 0.10  | -0.09 | -0.81 | -1.07 | -0.40 | 0.10  |

| States        | Due to Anthro |       |       |       |       |       |       | Due to BB |       |       |       |       |       |       |
|---------------|---------------|-------|-------|-------|-------|-------|-------|-----------|-------|-------|-------|-------|-------|-------|
|               | 2000          | 2005  | 2010  | 2011  | 2012  | 2013  | 2014  | 2000      | 2005  | 2010  | 2011  | 2012  | 2013  | 2014  |
| Mizoram       | 1.72          | 4.59  | 8.10  | 8.63  | 9.81  | 9.27  | 10.58 | 5.14      | -2.08 | 1.03  | -4.99 | -2.72 | -2.54 | -0.73 |
| Nagaland      | 2.64          | 7.04  | 10.73 | 11.96 | 12.26 | 12.67 | 12.28 | 4.90      | -2.88 | 0.40  | -3.66 | -1.68 | -1.84 | 2.06  |
| NCT of Delhi  | 4.62          | 8.04  | 17.15 | 15.38 | 14.42 | 17.16 | 15.63 | 0.13      | -0.77 | 0.65  | 0.48  | 0.52  | 1.20  | 0.70  |
| Odisha        | 2.67          | 7.30  | 12.17 | 12.41 | 11.11 | 12.35 | 13.51 | -0.68     | 0.70  | 0.42  | 1.04  | -0.30 | 0.36  | -0.13 |
| Puducherry    | /             | /     | /     | /     | /     | /     | /     | /         | /     | /     | /     | /     | /     | /     |
| Punjab        | 2.67          | 5.27  | 10.10 | 8.13  | 7.77  | 9.22  | 8.49  | -0.52     | -0.01 | 0.04  | 0.55  | -0.12 | 0.52  | 0.20  |
| Rajasthan     | 2.29          | 5.32  | 9.49  | 8.14  | 7.32  | 8.97  | 8.74  | -0.17     | -0.40 | 0.60  | 0.40  | -0.05 | 0.78  | 0.00  |
| Sikkim        | 9.45          | 14.34 | 23.29 | 25.06 | 23.74 | 23.69 | 24.69 | -0.57     | 0.36  | -0.66 | 1.51  | -0.84 | -0.90 | -0.57 |
| Tamil Nadu    | 1.50          | 3.82  | 8.25  | 8.01  | 7.93  | 7.15  | 8.43  | -0.57     | 0.20  | 0.33  | 0.58  | 0.26  | -0.21 | 0.60  |
| Telangana     | 1.65          | 6.81  | 12.29 | 11.30 | 10.61 | 11.83 | 12.88 | -0.77     | 0.33  | 0.64  | 0.21  | 0.11  | 0.41  | 0.53  |
| Tripura       | 3.19          | 8.09  | 12.84 | 12.35 | 13.76 | 13.18 | 15.40 | 4.17      | -1.03 | 0.10  | -2.55 | -1.71 | -1.11 | -0.67 |
| Uttar Pradesh | 3.24          | 6.57  | 11.99 | 11.48 | 10.58 | 12.67 | 11.39 | -0.52     | -0.07 | 0.65  | 0.18  | 0.48  | 0.52  | -0.09 |
| Uttarakhand   | 1.71          | 4.09  | 8.73  | 7.58  | 6.06  | 9.47  | 7.04  | -1.09     | -0.10 | 0.91  | -0.37 | 2.10  | 0.57  | -0.21 |
| West Bengal   | 3.15          | 6.99  | 11.92 | 11.92 | 11.33 | 11.85 | 13.25 | -0.45     | 0.54  | 0.04  | 0.20  | -0.91 | 0.27  | -0.47 |

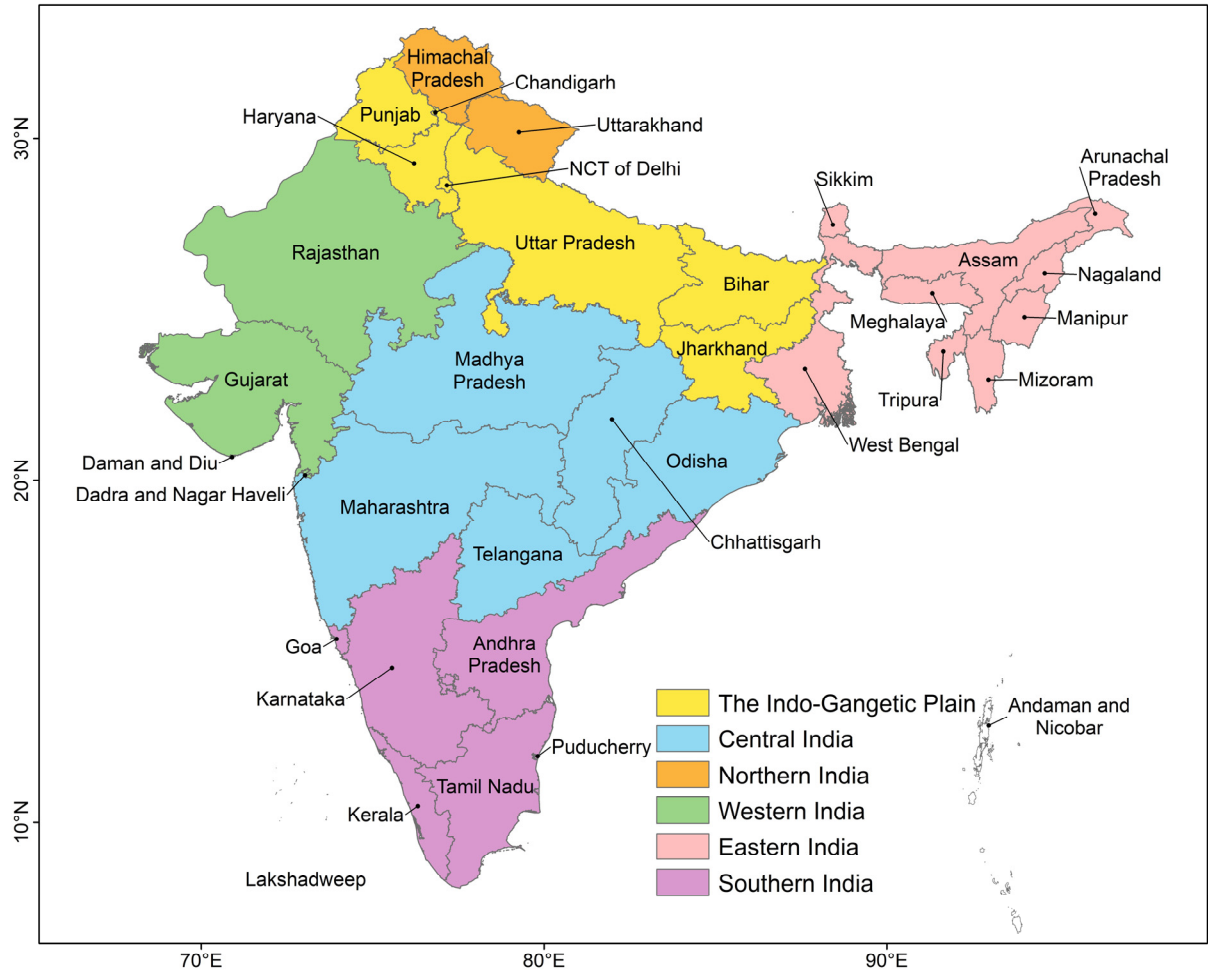

**Figure S1.** A map of India marked into six regions based on meteorological conditions and aerosol variability (adapted from David et al. 2018).



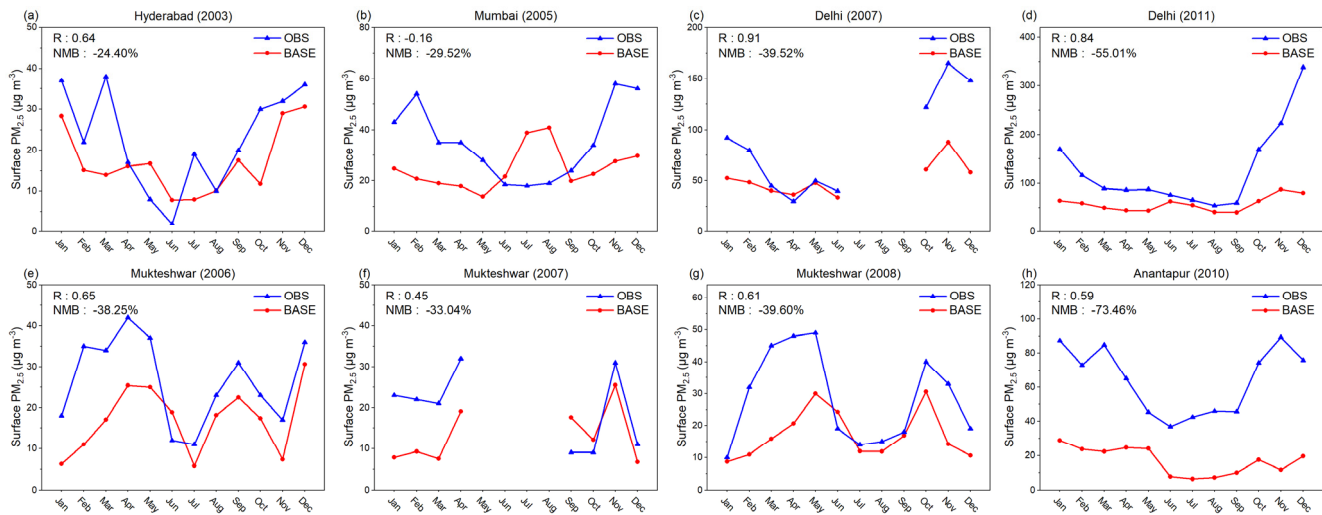

**Figure S2.** Comparison of the seasonal variations of surface  $PM_{2.5}$  between ground-based observations (blue triangle) and the BASE simulation sampled at observation sites (red circle).

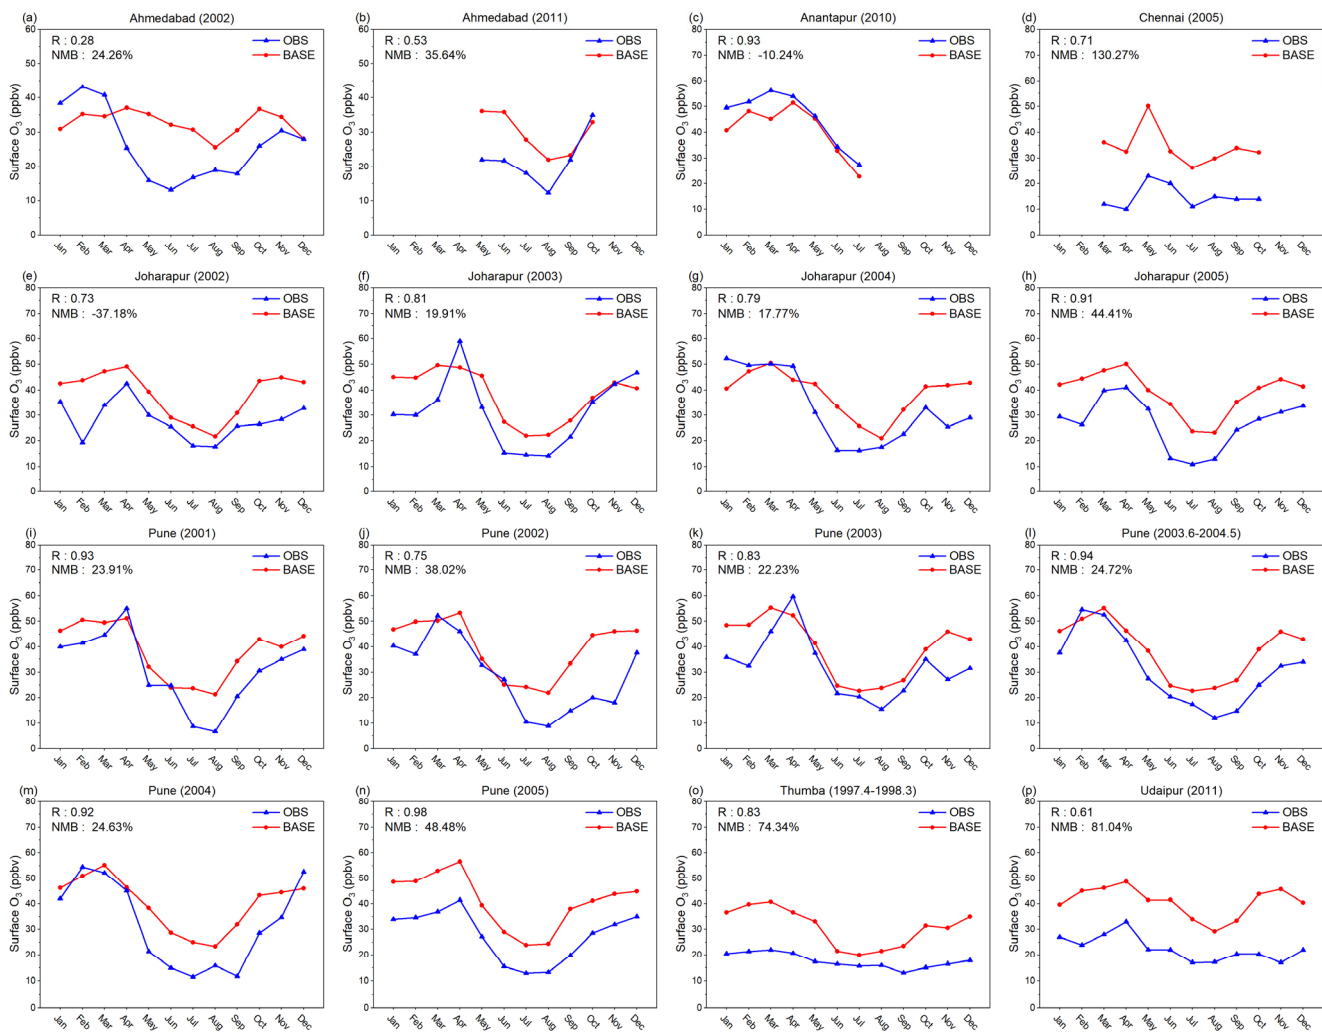

25

**Figure S3.** Comparison of the seasonal variations of surface  $O_3$  between ground-based observations (blue triangle) and the BASE simulation sampled at observation sites (red circle).

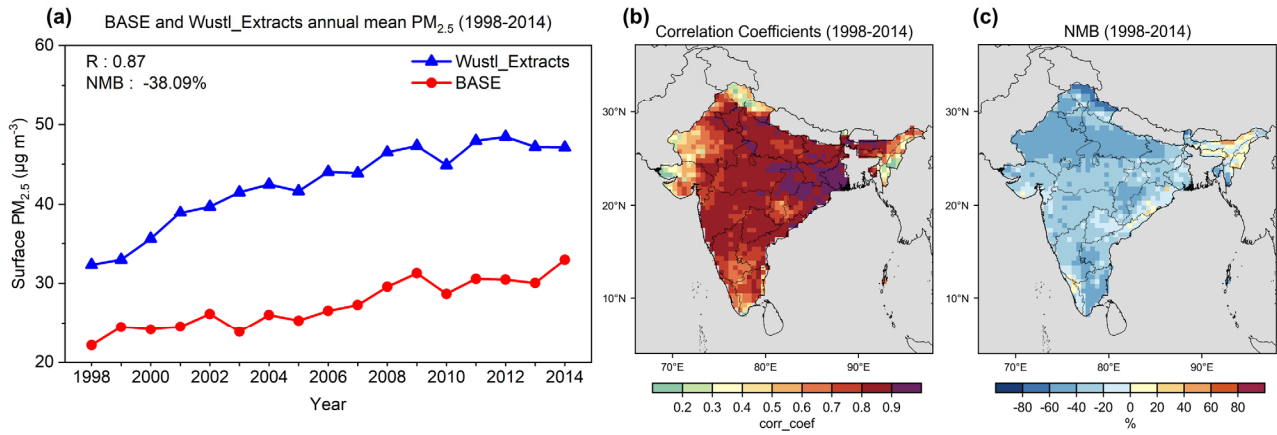

30 **Figure S4.** (a) Comparison of the interannual variations of surface  $PM_{2.5}$  between Wustl\_Extracts (reanalysis ground-level annual  $PM_{2.5}$  concentrations from the Atmospheric Composition Analysis Group (ACAG) at Washington University in St.Louis.) (blue triangle) and the BASE simulation (red circle), and spatial distribution of (b) correlation coefficient, and (c) annual mean NMB from 1998 to 2014.

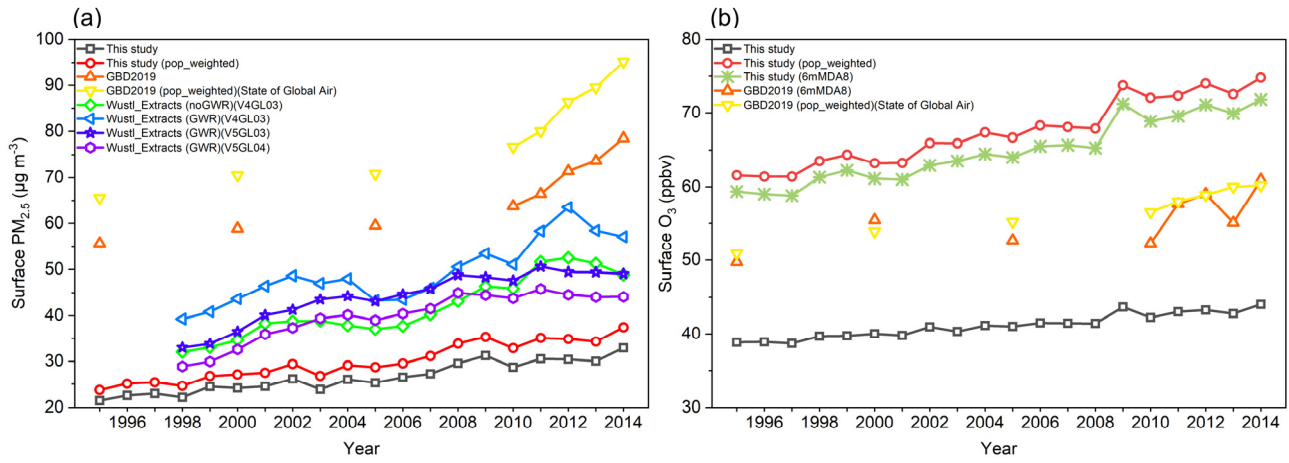

35

Figure S5. Compared annual  $PM_{2.5}$  and  $O_3$  concentrations with the GBD2019 datasets.

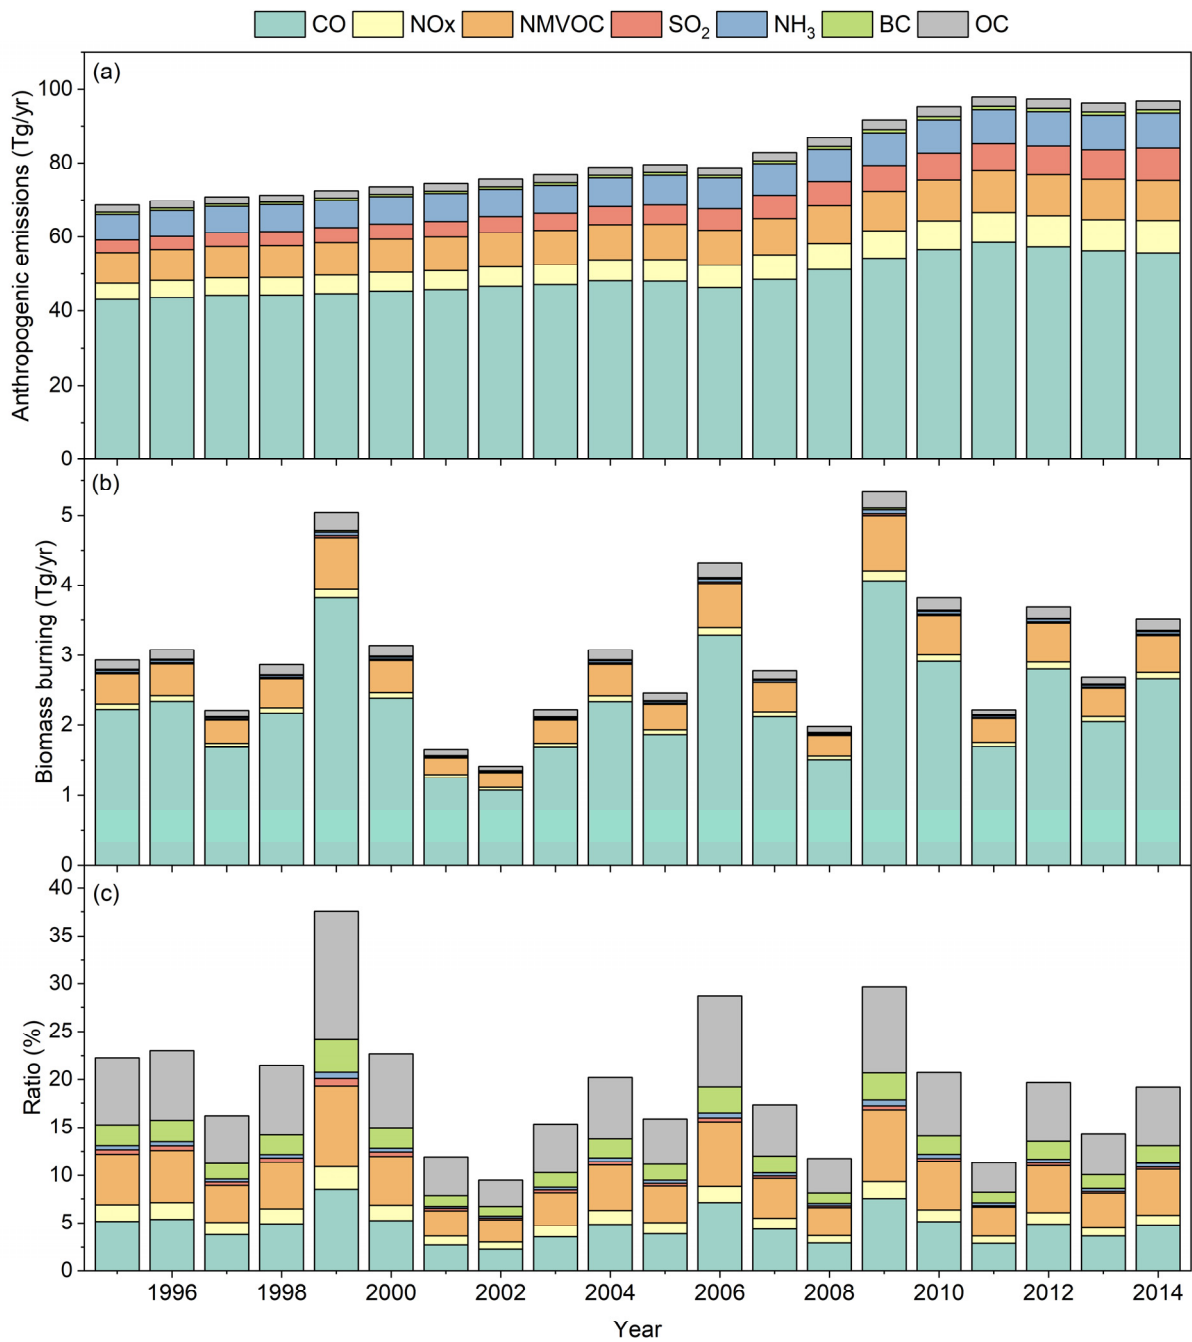

**Figure S6.** Annual emissions for (a) anthropogenic, (b) biomass burning and (c) the ratio of biomass burning to anthropogenic emissions in India from 1995-2014 from the CEDS.

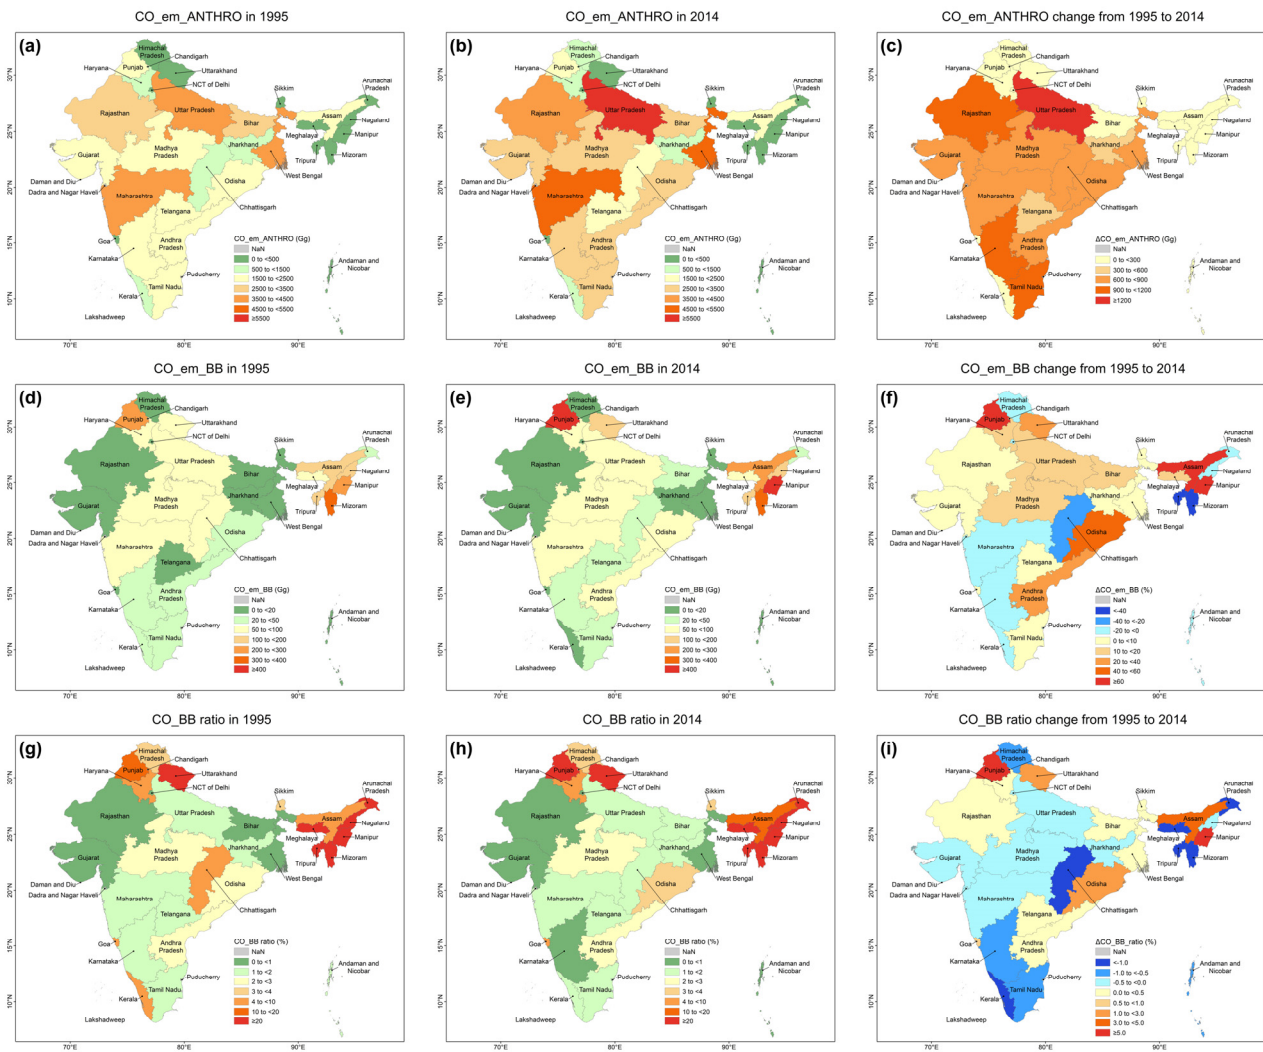

**Figure S7.** The spatial distribution of CO from (a) anthropogenic emissions, (b) biomass burning emissions, and (c) the ratio of CO from biomass burning emissions to CO from anthropogenic emissions in 1995 and 2014. The changes from 1995 to 2014 are also presented.

## Interannual variation of PM<sub>2.5</sub> and O<sub>3</sub> from 1995 to 2014

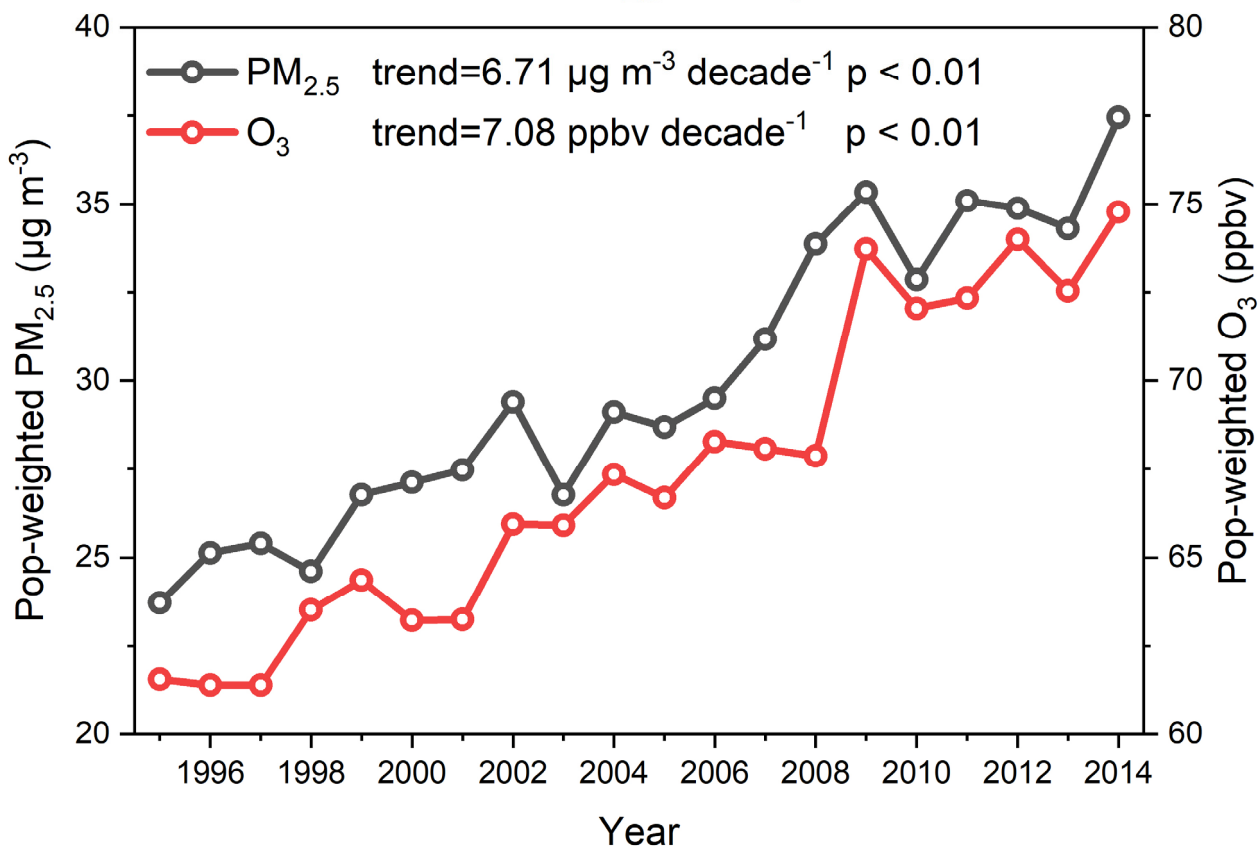

**Figure S8.** The interannual variation of pop-weighted PM<sub>2.5</sub> and O<sub>3</sub> in India from 1995 to 2014.

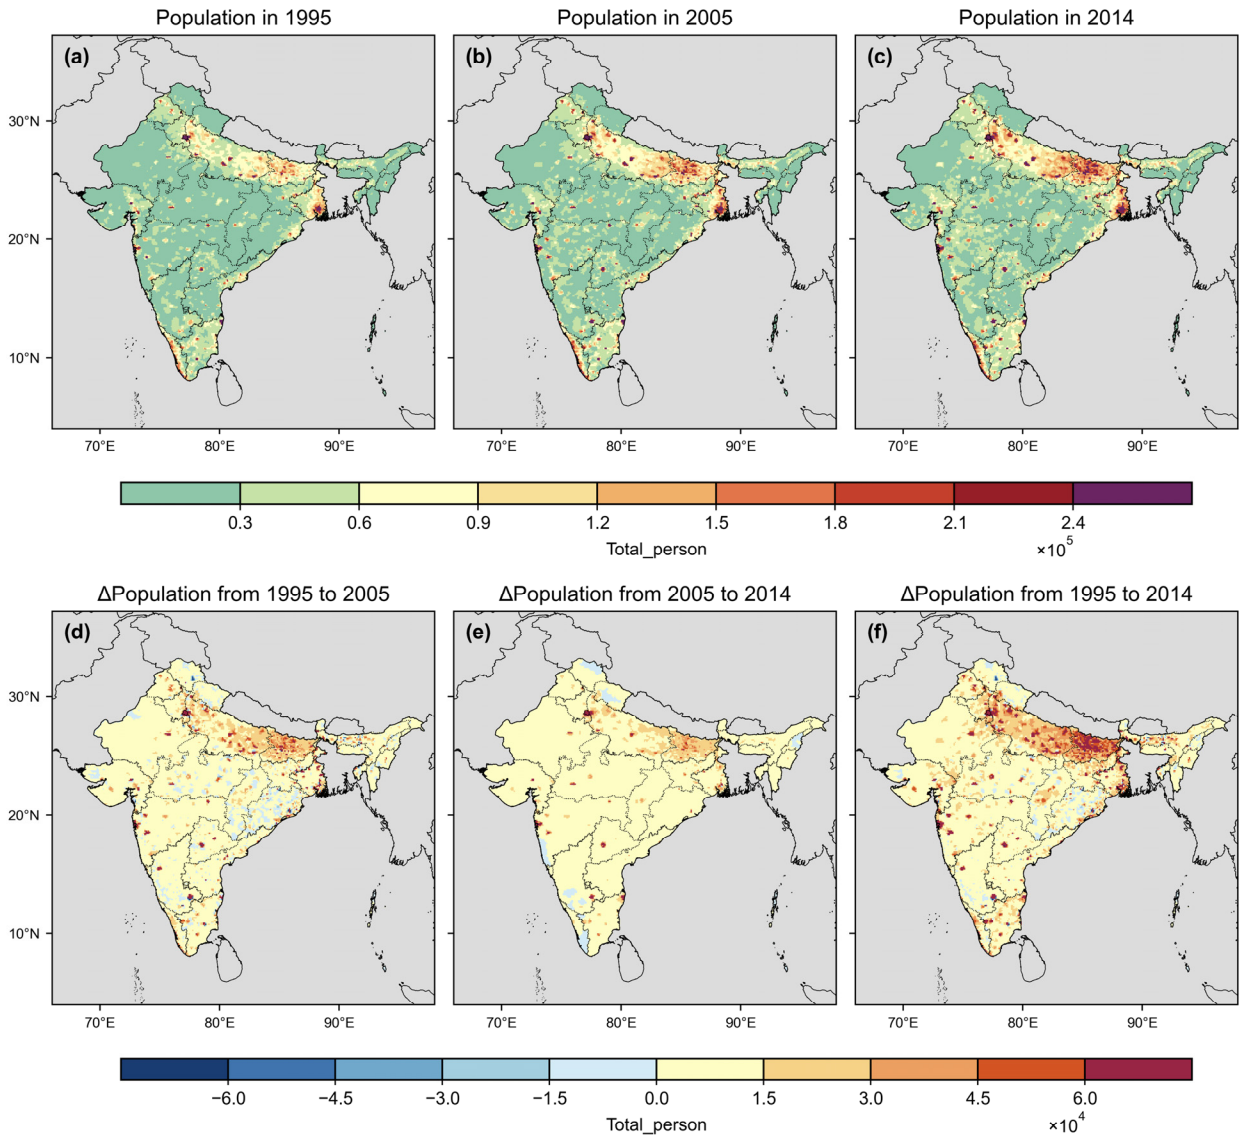

50

**Figure S9.** The spatial distribution of population in India from 1995 to 2014. The spatial distribution of population in India in (a) 1995, (b) 2005, and (c) 2014, as well as the population changes at different time periods, (d) 1995 to 2005, (e) 2005 to 2014, and (f) 1995 to 2014.



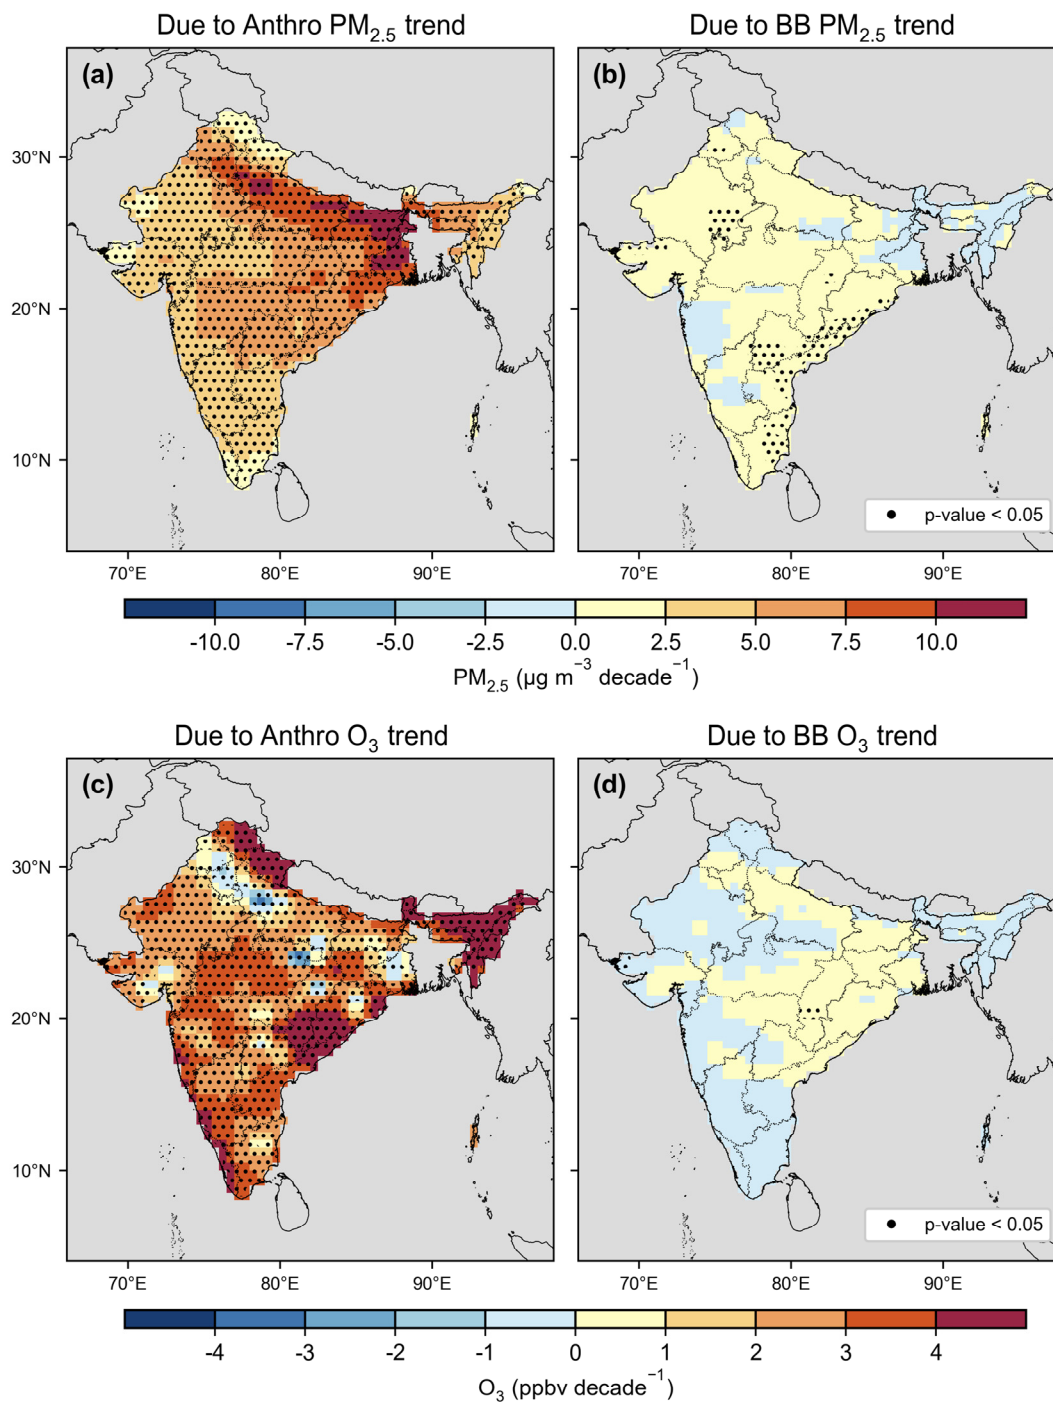

55

**Figure S10.** The contributions of (a, c) ANTHRO and (b, d) BB emissions for the trends of air quality change in India from 1995 to 2014 for (a, b) PM<sub>2.5</sub> and (c, d) O<sub>3</sub>. The units are  $\mu\text{g m}^{-3} \text{ decade}^{-1}$  for PM<sub>2.5</sub>, and  $\text{ppbv decade}^{-1}$  for O<sub>3</sub>.

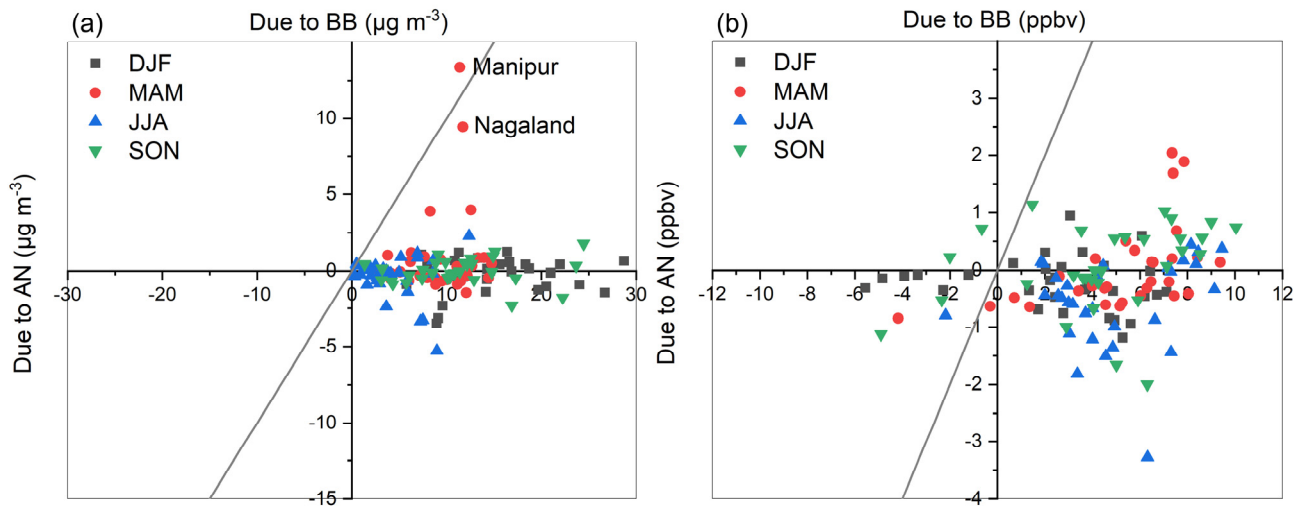

**Figure S11.** Contributions of ANTHRO and BB changes from 1995 to 2014 on seasonal  $\text{PM}_{2.5}$  (a) and  $\text{O}_3$  (b) changes in 60 India administrative regions. The contributions from ANTHRO were calculated as the differences between BASE and FixAN in 2014, and the contributions from BB were calculated as the differences between BASE and FixBB in 2014. The X axis denotes the contribution from ANTHRO, while the Y axis denotes the contribution from BB. The solid line is the 1:1 ratio.

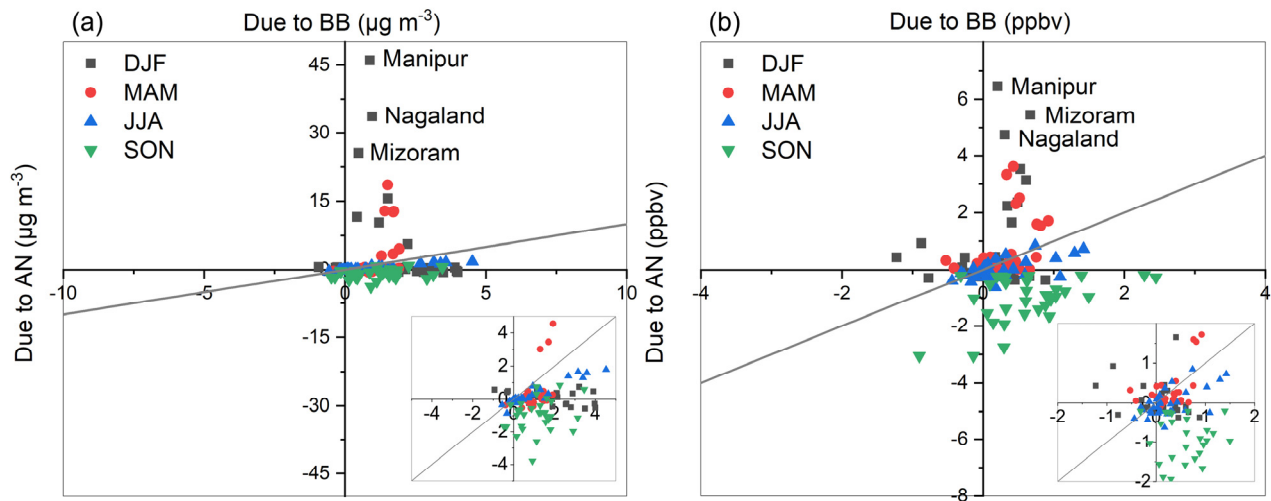

65

**Figure S12.** The same as Figure S11, but for the contributions from 1995 to 1999. The plots on the bottom right are the zoom-in results with smaller scales.

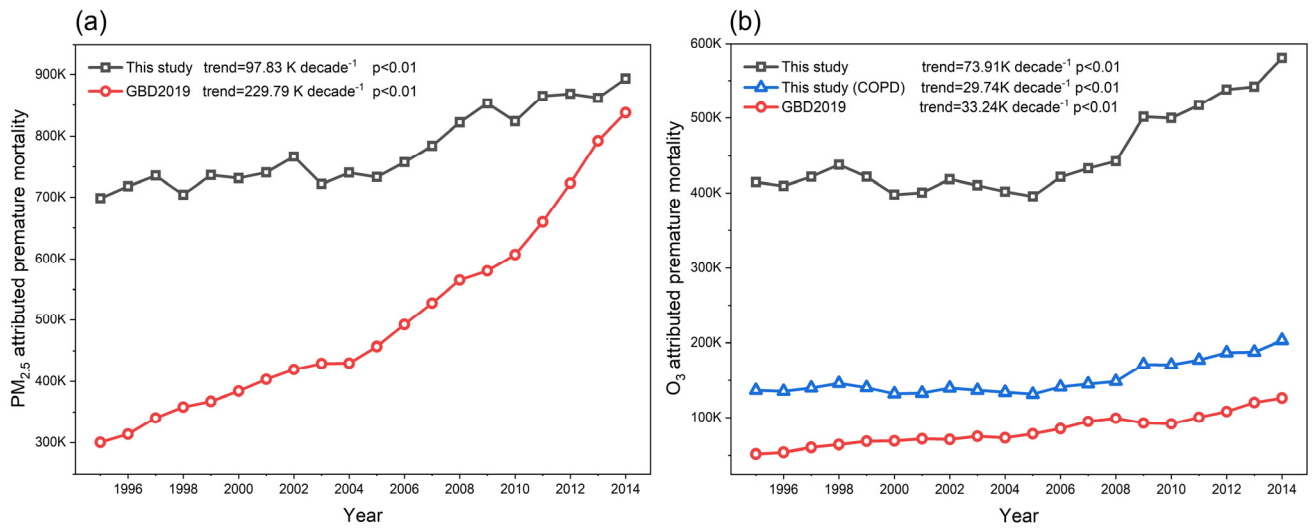

70 **Figure S13.** Comparisons of PM<sub>2.5</sub> and O<sub>3</sub> attributed premature mortality in India from 1995 to 2014 between our study and GBD2019.

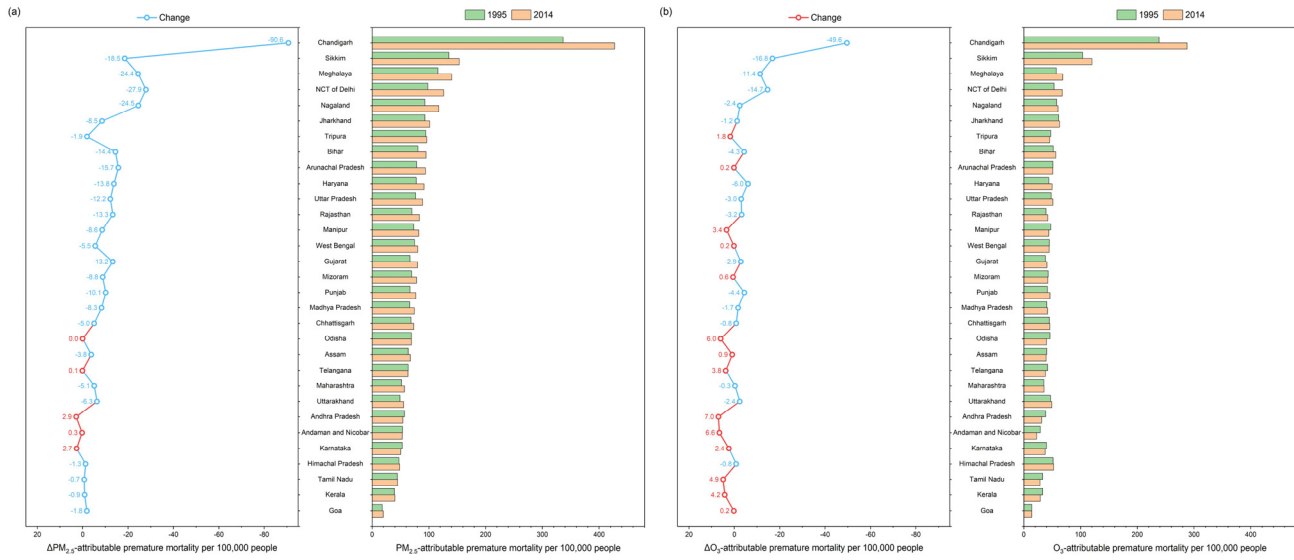

**Figure S14.** Premature mortality attributable to PM<sub>2.5</sub> (a) or O<sub>3</sub> (b) per capita (avoided deaths per 100,000 people) and changes in the states of India from 1995 to 2014.

## REFERENCES

- 80 Anenberg, S. C., Horowitz, L. W., Tong, D. Q., and West, J. J.: An Estimate of the Global Burden of Anthropogenic Ozone and Fine Particulate Matter on Premature Human Mortality Using Atmospheric Modeling, *Environ Health Perspect*, 118, 1189–1195, <https://doi.org/10.1289/ehp.0901220>, 2010.
- Apte, J. S., Marshall, J. D., Cohen, A. J., and Brauer, M.: Addressing Global Mortality from Ambient PM<sub>2.5</sub>, *Environ. Sci. Technol.*, 49, 8057–8066, <https://doi.org/10.1021/acs.est.5b01236>, 2015.
- 85 Brauer, M., Freedman, G., Frostad, J., van Donkelaar, A., Martin, R. V., Dentener, F., Dingenen, R. van, Estep, K., Amini, H., Apte, J. S., Balakrishnan, K., Barregard, L., Broday, D., Feigin, V., Ghosh, S., Hopke, P. K., Knibbs, L. D., Kokubo, Y., Liu, Y., Ma, S., Morawska, L., Sangrador, J. L. T., Shaddick, G., Anderson, H. R., Vos, T., Forouzanfar, M. H., Burnett, R. T., and Cohen, A.: Ambient Air Pollution Exposure Estimation for the Global Burden of Disease 2013, *Environ. Sci. Technol.*, 50, 79–88, <https://doi.org/10.1021/acs.est.5b03709>, 2016.
- Chowdhury, S. and Dey, S.: Cause-specific premature death from ambient PM<sub>2.5</sub> exposure in India: Estimate adjusted for baseline mortality, *Environment International*, 91, 283–290, <https://doi.org/10.1016/j.envint.2016.03.004>, 2016.
- 90 Cohen, A. J., Brauer, M., Burnett, R., Anderson, H. R., Frostad, J., Estep, K., Balakrishnan, K., Brunekreef, B., Dandona, L., Dandona, R., Feigin, V., Freedman, G., Hubbell, B., Jobling, A., Kan, H., Knibbs, L., Liu, Y., Martin, R., Morawska, L., Pope, C. A., Shin, H., Straif, K., Shaddick, G., Thomas, M., van Dingenen, R., van Donkelaar, A., Vos, T., Murray, C. J. L., and Forouzanfar, M. H.: Estimates and 25-year trends of the global burden of disease attributable to ambient air pollution: an analysis of data from the Global Burden of Diseases Study 2015, *The Lancet*, 389, 1907–  
95 1918, [https://doi.org/10.1016/S0140-6736\(17\)30505-6](https://doi.org/10.1016/S0140-6736(17)30505-6), 2017.
- Conibear, L., Butt, E. W., Knote, C., Arnold, S. R., and Spracklen, D. V.: Residential energy use emissions dominate health impacts from exposure to ambient particulate matter in India, *Nat Commun*, 9, 617, <https://doi.org/10.1038/s41467-018-02986-7>, 2018.
- 100 David, L. M., Ravishankara, A. R., Kodros, J. K., Venkataraman, C., Sadavarte, P., Pierce, J. R., Chaliyakunnel, S., and Millet, D. B.: Aerosol Optical Depth Over India, *Journal of Geophysical Research: Atmospheres*, 123, 3688–3703, <https://doi.org/10.1002/2017JD027719>, 2018.
- 105 van Donkelaar, A., Martin, R. V., Brauer, M., Hsu, N. C., Kahn, R. A., Levy, R. C., Lyapustin, A., Sayer, A. M., and Winker, D. M.: Global Estimates of Fine Particulate Matter using a Combined Geophysical-Statistical Method with Information from Satellites, Models, and Monitors, *Environ. Sci. Technol.*, 50, 3762–3772, <https://doi.org/10.1021/acs.est.5b05833>, 2016.
- Guo, H., Kota, S. H., Chen, K., Sahu, S. K., Hu, J., Ying, Q., Wang, Y., and Zhang, H.: Source contributions and potential reductions to health effects of particulate matter in India, *Atmospheric Chemistry and Physics*, 18, 15219–15229, <https://doi.org/10.5194/acp-18-15219-2018>, 2018.
- 110 Hakim, Z. Q., Archer-Nicholls, S., Beig, G., Folberth, G. A., Sudo, K., Abraham, N. L., Ghude, S., Henze, D. K., and Archibald, A. T.: Evaluation of tropospheric ozone and ozone precursors in simulations from the HTAPII and CCMI model intercomparisons – a focus on the Indian subcontinent, *Atmospheric Chemistry and Physics*, 19, 6437–6458, <https://doi.org/10.5194/acp-19-6437-2019>, 2019.
- Jia, B., Gao, M., Zhang, X., Xiao, X., Zhang, S., and Lam Yung, K. K.: Rapid increase in mortality attributable to PM<sub>2.5</sub> exposure in India over 1998–2015, *Chemosphere*, 269, 128715,

115 <https://doi.org/10.1016/j.chemosphere.2020.128715>, 2021.

Liu, L., Hu, L., Liu, Y., and Wang, H.: Modeling of the health impacts of ambient ozone pollution in China and India, *Atmospheric Environment*, 267, 118753, <https://doi.org/10.1016/j.atmosenv.2021.118753>, 2021.

120 Sahu, S. K., Sharma, S., Zhang, H., Chejarla, V., Guo, H., Hu, J., Ying, Q., Xing, J., and Kota, S. H.: Estimating ground level PM<sub>2.5</sub> concentrations and associated health risk in India using satellite based AOD and WRF predicted meteorological parameters, *Chemosphere*, 255, 126969, <https://doi.org/10.1016/j.chemosphere.2020.126969>, 2020.

Sharma, S., Chatani, S., Mahtta, R., Goel, A., and Kumar, A.: Sensitivity analysis of ground level ozone in India using WRF-CMAQ models, *Atmospheric Environment*, 131, 29–40, <https://doi.org/10.1016/j.atmosenv.2016.01.036>, 2016.

125 Silva, R. A., Adelman, Z., Fry, M. M., and West, J. J.: The Impact of Individual Anthropogenic Emissions Sectors on the Global Burden of Human Mortality due to Ambient Air Pollution, *Environmental Health Perspectives*, 124, 1776–1784, <https://doi.org/10.1289/EHP177>, 2016.
